# Supplementary material
Source: Springer Nature journal article supplement (https://www.springermedizin.de/resource/supplementary/12936_2011_1701_MOESM4_ESM.pdf/9541520)
Supplement: MOESM4 [file 9541520]

**Longitudinal study**  
Post-intervention doses /  
pre-intervention doses  
(PP)

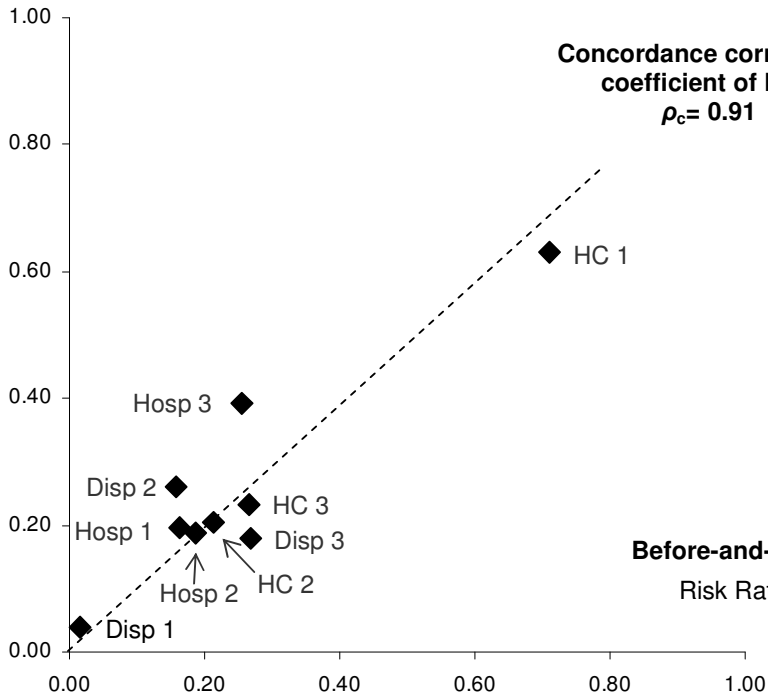

**Before-and-after study**  
Risk Ratio (RR)
